# Supplementary material for: Urinary Tetrahydrocannabinol After 4 Weeks of a Full-Spectrum, High-Cannabidiol Treatment in an Open-label Clinical Trial
Source: PubMed Central journal article supplement (PMC9429743; doi:10.1001/jamapsychiatry.2020.3567), 2020-11-04
Supplement: YLD200012supp1_prod.pdf [file YLD200012supp1_prod.pdf]

1  
2 MCLEAN HOSPITAL RESEARCH PROTOCOL  
3  
4

5 **1. Title: Sublingual Cannabidiol for Anxiety: Open-Label Phase**  
6  
7

8  
9 **2. Investigators**

10  
11 Principal Investigator: Staci A. Gruber, Ph.D.  
12 Cognitive and Clinical Neuroimaging Core  
13 Neuroimaging Center  
14 McLean Hospital  
15 115 Mill Street  
16 Belmont, MA 02478  
17

18 Co-Investigators: Scott Lukas, Ph.D.  
19 Behavioral Psychopharmacology Research Laboratory  
20 Neuroimaging Center  
21 McLean Hospital  
22 115 Mill Street  
23 Belmont, MA 02478  
24

25 David P. Olson, MD, PhD.  
26 Neuroimaging Center  
27 McLean Hospital  
28 115 Mill Street  
29 Belmont, MA 02478  
30

31 Consulting Clinicians: Milissa Kaufman, MD, PhD.  
32 Dissociative Disorders and Trauma Program  
33 The Hill Center for Women  
34 McLean Hospital  
35 115 Mill Street  
36 Belmont, MA 02478  
37

38 Franca Centorrino, MD  
39 Schizophrenia and Bipolar Disorder Outpatient Clinic  
40 Psychopharmacology Research Program  
41 McLean Hospital  
42 115 Mill Street  
43 Belmont, MA 02478  
44

45 Study Coordinators: Mary Kathryn Dahlgren, Ph.D.  
46 Kelly A. Sagar, Ph.D.

47 Rosemary Smith, B.S.  
48 Ashley Lambros, B.S.  
49 Madeline Kuppe, B.S.  
50 Celine El-Abboud, B.A.

51

52 **3. Site where the study will be performed**

53 Subjects will complete study visits at the Neuroimaging Center, McLean Hospital.

54

55 **4. Introduction: Background and Significance**

56 Cannabis has been used for medicinal purposes across many cultures for a range of disorders  
57 dating as far back as 2700 B.C. The plant is comprised of a variety of components, including  
58 phytocannabinoids that act on CB1 and CB2 receptors. Numerous phytocannabinoids are present  
59 in cannabis, including the major psychoactive constituent of cannabis, delta-9  
60 tetrahydrocannabinol (THC), which acts as a CB1 receptor agonist. Another phytocannabinoid,  
61 cannabidiol (CBD), is a major non-psychoactive constituent of cannabis and is only a partial  
62 agonist at CB1 receptors. Increasing evidence indicates that CBD in particular may have  
63 significant medicinal properties and benefits; experimental studies in both animals and humans  
64 have demonstrated that CBD can act as an anticonvulsant, antipsychotic, and muscle relaxant.  
65 CBD is often found in higher levels in products dispensed as medical marijuana relative to  
66 strains used primarily for recreational use. Several studies have demonstrated that CBD produces  
67 acute anxiolytic effects in animals and humans, although thus far no clinical trials of CBD have  
68 been conducted in patients with anxiety. As a growing number of states are legalizing medical  
69 marijuana, a gap exists in the scientific literature regarding the effects of CBD on anxiety.

70

71 **Rationale**

72 Pilot data from the first phase of the MIND project, an observational study of the impact of  
73 medical marijuana on cognition, brain function, and quality of life, suggest an increase in quality  
74 of life measures accompanied by decreases in depression and anxiety following treatment with  
75 medical marijuana. Despite the recent interest in medical marijuana and cannabinoid-based  
76 products, no published studies to date have conducted a clinical trial of products high in CBD in  
77 individuals who suffer from anxiety. Further, none have systematically evaluated baseline and  
78 follow-up clinical state and related quality of life measures in individuals taking CBD, or  
79 assessed measures of brain structure and function before and after treatment with CBD using  
80 neuropsychological measures or neuroimaging. As a growing number of states are legalizing  
81 medical marijuana and increasing evidence suggests that CBD may exert anxiolytic effects, there  
82 is a gap in the literature regarding the effects of CBD, often found in higher levels in medical  
83 marijuana than recreational marijuana, on anxiety.

84

85 **5. Research Objectives and Goals: Specific Aims**

86

87 The proposed investigation is designed to examine the impact of the administration of a  
88 sublingual high-CBD compound on individuals with symptoms of anxiety.

89

90 **Specific Aim 1:** To assess pre- and post-CBD treatment clinical state ratings of anxiety and  
91 quality-of-life ratings in individuals with anxiety disorders.

92  
93 **Specific Aim 2:** To assess pre- and post-CBD treatment performance on a range of  
94 neurocognitive measures designed to examine cognitive function.

95  
96 **Specific Aim 3:** In a subset of individuals, to examine structural and functional changes that may  
97 occur in the brain following treatment with CBD using multimodal magnetic resonance imaging  
98 (MRI) techniques.

99  
100 **Exploratory Aim 1:** In a subset of individuals, to examine the pharmacokinetics and  
101 pharmacodynamics (PK/PD) of this CBD tincture via continuous blood draw.

102  
103 **Exploratory Aim 2:** to examine urinary THC status (positive/negative) and related variables  
104 over the course of treatment

## 105 106 **6. Study Design, Procedures, and Subjects**

### 107 108 **Study Overview**

109 This study is four-week, open label clinical trial of a high-CBD containing compound in  
110 individuals with anxiety. Participants will be pre-screened by phone in order to evaluate their  
111 eligibility for the study. If approved, participants will come to the hospital for a  
112 baseline/screening visit, and will complete a structured clinical interview, clinical and quality of  
113 life questionnaires, and cognitive assessments. Enrolled participants will be given a solution to  
114 use for the duration of the study; participants will be instructed to self-administer 1 milliliter (ml)  
115 of the solution under the tongue three times per day for four weeks. Throughout the treatment  
116 period, participants will return to the hospital on a weekly basis to complete questionnaires about  
117 their mood and quality of life. Participants will also return to the hospital for a final visit after  
118 four weeks of treatment to complete additional questionnaires and cognitive assessments. All  
119 patients will also complete in-house drug assays and positive results will be confirmed by an  
120 outside laboratory (Quest Diagnostics).

121 The open-label phase I trial will assess the efficacy of the dose chosen for a subsequent double-  
122 blind phase of the study. This open-label trial will enroll up to 16 participants who have  
123 expressed interest in using CBD, and who have anxiety. A subset of participants (up to n=16)  
124 will also complete an extra visit that includes clinical rating scales and a 2-hour continuous blood  
125 draw directly following administration of the tincture in order to assess plasma concentration of  
126 CBD over time and correlation with anxiety.

### 127 128 **Study Visits**

129 Subjects will meet with the Principal Investigator, a Clinical Neuropsychologist, or a trained  
130 Research Assistant at McLean Hospital for five visits (baseline, and four weekly visits  
131 throughout the 4-week treatment period), each lasting approximately 1 to 3 hours. A subset of  
132 subjects in the open-label phase will also complete an optional 6<sup>th</sup> visit; this visit will occur after  
133 a >1 week washout period after the final (week 4) visit, where they will return to the lab to  
134 complete a 2-hour continuous blood draw after administration of the study product. Subjects will

135 review and sign the approved informed consent form prior to engaging in any study procedures.  
136 A structured clinical interview (SCID-P) will be administered, and demographic information,  
137 substance abuse/use, and medical histories will also be obtained and reviewed with the study  
138 physician. Study inclusion/exclusion criteria will be applied, and appropriate subjects will be  
139 enrolled and complete the rest of the study visit.

140  
141 A tiered payment system will be used for a payment of \$75 at visit 1, \$50 at visits 2-4, and \$75 at  
142 visit 5 for a total of \$300; if termination occurs during any point of the visit, subjects are  
143 compensated at a rate of \$25 per hour.

## 144 **Outcome Measures**

145  
146  
147 Primary Outcome Measures:

- 148 1. Change from Baseline in Self-Reported Anxiety as Assessed by the Beck Anxiety  
149 Inventory (BAI) [ Time Frame: Week 1, Week 2, Week 3, Week 4 ]

150  
151 The BAI is a 21-item self-report measure used to rate subjective, somatic, and panic-related  
152 symptoms of anxiety on a scale of 0 to 3, and will be given to participants on a weekly basis.

153  
154  
155 Secondary Outcome Measures:

- 156 1. Change from Baseline in Anxiety Assessed by the Hamilton Anxiety Scale (HAM-A)  
157 [ Time Frame: Week 1, Week 2, Week 3, Week 4 ]

158  
159 The HAM-A is an administered measure of anxiety that will be given on a weekly basis; a  
160 variety of symptoms are rated on a scale of 0 to 4.

- 161  
162 2. Change from Baseline in Self-Reported Anxiety Assessed by the State-Trait Anxiety  
163 Inventory (STAI) [ Time Frame: Week 1, Week 2, Week 3, Week 4 ]

164  
165 This self-report measure is comprised of two 20-item scales, with a range of four possible  
166 responses from 1 to 4, and differentiates between the more temporary condition of "state"  
167 anxiety and the more general quality of "trait" anxiety. It will be given on a weekly basis.

## 168 169 170 **Subjects**

171 Subjects will be recruited through IRB-approved advertisements and flyers in regions that have  
172 approved medical marijuana. Additionally, medical marijuana certification and healthcare  
173 facilities throughout New England may also refer interested patients to contact the study  
174 recruitment line for further screening. These healthcare groups provide their interested patients  
175 who meet for general inclusion criteria with study recruitment materials.

176  
177  
178

179 **Recruitment and Informed Consent**

180 Participants will be recruited through IRB-approved advertisements and flyers throughout the  
181 Greater Boston area, including medical marijuana certification centers, as well as online  
182 advertisements (including the Partners Clinical Trials website). Written, informed consent will  
183 be obtained from all participants following a screening interview to determine eligibility. The  
184 consent form will include a description of the study, information about procedures, and  
185 assurances of confidentiality. Prior to signing the informed consent, subjects will be asked if they  
186 have any questions regarding the conduct or design of the study. A copy of the signed consent  
187 form will be given to the study subject, and a copy placed in their research record. All subjects  
188 will be reminded that their participation is completely voluntary, and may withdraw or  
189 discontinue the study at any time. The informed consent will be approved by the McLean  
190 Hospital Institutional Review Board, which monitors study progress, safety and outcome on a  
191 regular basis.

192  
193 Confidentiality of information collected will be maintained with the assignment of an  
194 identification number or code, which will be used in place of subject names in all data analyses  
195 and reports. Computer systems are located in the Cognitive and Clinical Neuroimaging Core.  
196 Keys showing the assignment of identification numbers to subject names will be stored with  
197 subject files in room 204 of the Neuroimaging Building under lock and key. All of the data that  
198 is collected will be kept for a minimum of seven years once the study has been completed. Only  
199 the Principal Investigator, Dr. Staci Gruber and her research staff will have access to the data  
200 that is collected.

201  
202 All subjects will be required to give informed consent and must understand all procedures  
203 prior to their participation in the study. A member of the research staff will explain the  
204 consenting procedure and be available for any questions that arise from the consent form. All  
205 subjects must be able to give their own consent for participation. All signed consent forms  
206 will be kept in the subject's case report form in room 204 of the Neuroimaging Center under  
207 lock and key.

208  
209 **Inclusion Criteria:**

- 210 • 18 or older
- 211 • Native English speaker or acquired English prior to age 5
- 212 • Provides informed consent

213  
214 **Exclusion Criteria:**

- 215 • Non-native English speakers
- 216 • Estimated IQ < 75
- 217 • Pregnancy
- 218 • Presence of serious medical illness, including liver or kidney disease,  
219 neurological disorder, or certain psychiatric disorders

220  
221 Subjects will be asked to complete a 3-item demographics questionnaire in order for the  
222 researchers to obtain accurate information about subject's racial and ethnic identification. This  
223 information is required to be reported in federal grant progress reports.

224

225 No subjects will be excluded on the basis of race, sex, ethnicity or sexual orientation.  
226

227 **Study Termination Criteria**

228 Subjects may withdraw at any time and for any reason. A subject's participation in the trial  
229 will end if any of the following criteria are met:

- 230 a) Completion of the study  
231 b) Subject reports adverse effects of CBD and wishes to leave the study, or if study staff  
232 determine that study termination is appropriate.  
233 c) Subject does not use CBD as directed  
234 d) Subjects reports use of cannabis or other cannabinoid-containing products  
235 e) Subject sustains a significant head injury  
236 f) Any study exclusions are met (i.e. change in medical status, pregnancy, etc.)  
237

238 **Data Collection**

239 Results from subjects' demographic, clinical and neuroimaging data will be coded with a  
240 subject identification number, evaluated, and kept under lock and key at the CCNC office in  
241 room 204, Neuroimaging Center, McLean Hospital; no personally identifiable information  
242 accompanies this data. Urine samples will be coded by subject's date of birth, initials, and  
243 study code.  
244

245 **Monitoring and Quality Assurance**

246 In the unlikely event that an adverse event occurs, it will be reported to the primary investigator  
247 and the Institutional Review Board's guidelines will be followed to ensure adequate reporting  
248 and response. Regulatory binders are kept for all studies at McLean Hospital in order to  
249 constantly monitor investigations and ensure that all data is collected safely.  
250

251 The principal investigator will be responsible for monitoring and ensuring the integrity of the  
252 data and adherence to the IRB-approved protocol. They will review any questions or concerns  
253 regarding data, and will review each signed consent form for the study. There are no plans to  
254 utilize a Data Safety Monitoring Board (DSMB) due to the extremely low side-effect profile of  
255 CBD, but if the IRB deems that an independent DSMB is necessary, the investigators would be  
256 happy to suggest individuals who are appropriate or to consider outside suggestions from IRB  
257 members.  
258

259 Data analyses will be conducted prior to initiating the double-blind phase in order to ensure that  
260 patients derive clinical benefit from the dose selected. Specifically, in conjunction with Drs.  
261 Olson and Kaufman, we will assess clinical response after the first 5 patients have completed  
262 their 4 week trial. If we do not see clinical improvement based on a review of clinical scales,  
263 subjective reports and performance, we will consider increasing the dose to 1.5 droppers three  
264 times a day for a total of 45 mg CBD per day. Clinical improvement using scales will be defined  
265 as a 15% reduction in BAI scores from baseline. Findings will be used to inform the double blind  
266 phase of the study, which would not begin until adequate dose/response is achieved. An  
267 amendment would be submitted to the IRB for approval prior to adjusting the dose of CBD.  
268  
269  
270

271 **Statistical Approaches**

272 All statistical analyses will be conducted using IBM SPSS Statistics (version 20). Data will be  
273 screened for outliers and any data points more than 2 standard deviations from the group  
274 means will be excluded. Additionally, data will be screened for skew, kurtosis, non-normality,  
275 and homogeneity of variance. If the assumptions of parametric inferential analyses are not met,  
276 the appropriate non-parametric analyses will be performed. Baseline demographic, clinical,  
277 and neuropsychological data will be assessed using 2-tailed analyses of variance (ANOVAs).  
278 Between-group treatment differences over the course of the study will be assessed using a  
279 mixed model ANOVAs with Scheffe post hoc tests. Exploratory Pearson's r correlations (2-  
280 tailed) will be utilized to determine whether THC positive/negative status is related to  
281 demographic variables and amount of product used.

282

283

284 **Potential Risks and Discomforts**

285

286 **CBD Administration**

287 The proposed investigation is low risk because subjects are not asked to alter their existing  
288 medication regimen and instead are simply "adding on" either a placebo or a high-CBD  
289 compound. CBD has been shown to have an extremely low side effect profile and since the total  
290 amount of THC will not exceed 0.3% by weight, we do not expect significant side effects or  
291 psychoactive effects. CBD is not a scheduled substance, and there is no risk of intoxication or  
292 addiction to CBD.

293

294 Sublingual tinctures are unlikely to be viewed by the public as analogous to recreational smoked  
295 marijuana, thus decreasing the risk of the subject experiencing any potential negative appraisal  
296 arising from perceived notions associated with marijuana use while partaking in this study.

297

298 As with any clinical trial, there are risks of experiencing side effects from the administration of  
299 CBD or placebo; these side effects are very rare. Cunha et al. (1980) reported no signs of toxicity  
300 or serious side effects; in this two-part, placebo-controlled, double blind study, healthy  
301 volunteers were given 3 mg/kg of CBD or placebo per day for 30 days, and patients with  
302 epilepsy were given 200-300mg CBD or placebo per day for 4.5 months. The total dose of CBD  
303 per day for the current study will be 30mg – thus, we expect no significant side effects. Other  
304 studies have reported no adverse effects of CBD in patients with Huntington's disease,  
305 schizophrenia, and Parkinson's disease after repeated administration (Consroe et al. 1991;  
306 Leweke et al. 2012; Zuardi et al. 2006 and 2009).

307

308 Additionally, the safety of CBD administration in pregnant women and fetuses is unknown.  
309 Female participants capable of child-bearing will be asked to provide a sample of urine before  
310 the study is begun and at each subsequent study visit in order to screen for pregnancy. If the  
311 pregnancy test is positive at any point during the study, the subject will be immediately  
312 disqualified and participation in the study will cease. Participation requires that the participant  
313 uses contraception methods (such as abstinence, diaphragm, condom, or an intrauterine device)  
314 to prevent pregnancy for the duration of the study. The participant will be asked to notify study  
315 staff immediately if she misses a period or thinks she might be pregnant. In this case, the  
316 participant may have to withdraw from the study.

317  
318  
319  
320  
321  
322  
323  
324  
325  
326  
327  
328  
329  
330  
331  
332  
333  
334  
335  
336  
337  
338  
339  
340  
341  
342  
343  
344  
345  
346  
347  
348  
349  
350  
351  
352  
353  
354  
355  
356  
357  
358  
359  
360  
361  
362

Protection of risks: subjects will have the opportunity to report adverse effects at their weekly check-in visits via direct contact with the PI and study staff. This weekly reporting will reduce the likelihood that subjects experience significant negative side effects for any significant period of time, and the PI as well as their study physician will be reachable by page 24 hours a day 7 days a week.

#### Blood Draw

Subjects may have a bruise or pain from the site where the blood sample is acquired. There is also a small risk of feeling lightheaded, fainting, or infection. Clinical staff will be available to evaluate the subject if they experience any of these symptoms.

#### Potential Benefits

There may be no direct benefits to the subjects; however, based on previous research, it is reasonable to expect that some subjects may experience an improvement in clinical state or quality of life related to a reduction in anxiety.

It is reasonable to expect that this study will contribute to overall knowledge in this field and potentially provide benefits to society in general through improvements in understanding the effects of medicinal marijuana use, as well as the treatment of anxiety. Subjects may benefit from knowing that the results of this study may improve the future care of people with anxiety.

#### Compensation

Total compensation for completion of the entire study will be \$350, broken down as follows: \$75 for visits 1 and 5, \$50 for each of three interim visits, a \$50 completion bonus if the subject completes the full study. Subjects in the open-label phase who complete the optional 6<sup>th</sup> visit, which includes a blood draw, will receive an additional \$150, for a total of \$500. If subjects in the double-blind phase complete the additional MR scanning protocol at visits 1 and 5, they will receive an additional \$75 for those two visits for a total additional payment of \$150; therefore, the total compensation for those who complete the MR scanning component of the study will be \$500. Subjects may withdraw from the study at any point; and will still receive payment for the portion of the study they completed at a rate of \$25/hr.

For tax reporting purposes subjects' social security numbers are needed in order to process payment for participation in this study. McLean Hospital is required to inform the IRS of any payments received as a subject in research studies if they total over \$600 in a given calendar year. If that occurs, subjects will receive a 1099 form at the end of the year. No information identifying why payment was received is communicated to either the Hospital's accounting department or the government. This information is kept strictly confidential and is not retained in research or medical records.



363 **Anticipated Results and Potential Pitfalls**

364 We anticipate acquiring neurocognitive, clinical state, quality of life, and sleep/activity data  
365 from individuals who have been diagnosed with anxiety disorders and treated with CBD or  
366 placebo.

367  
368 Unsuccessful recruitment is a potential pitfall of this study. If subjects are not accurately  
369 screened or interviewed, their data may not be optimal for comparison.

370

371 **Timeline**

372 The initial phase of the project is expected to last approximately 18-24 months, with the  
373 possibility of extension and expansion after an initial assessment of pilot study findings. Initial  
374 study set-up should take no longer than 3 months, once funding is received, and subject  
375 recruitment should proceed immediately thereafter.

376
